# Supplementary material for: QTL Mapping and Validation for Kernel Area and Circumference in Common Wheat via High-Density SNP-Based Genotyping
Source: Front Plant Sci. 2021 Aug 17;12:713890. doi: 10.3389/fpls.2021.713890 (PMC8415916; doi:10.3389/fpls.2021.713890)
Supplement: Supplementary file 2 [file Table_2.XLSX]

## Sheet: Table S2
Table S2 Raw data of the KC and KA
Lines	2016KC	2018KC	2019KC	meanKC	2016KA	2018KA	2019KA	meanKA
1	16.433	17.5507	16.7077	16.8971	15.5525	17.3987	16.258	16.4031
2	18.794	20.7337	18.8543	19.4607	20.1745	21.6667	19.054	20.2984
3	17.358	18.836	17.8817	18.0252	17.4075	19.3073	18.3783	18.3644
4	16.06	17.1623	15.628	16.2834	15.1805	17.266	14.794	15.7468
5	17.957	19.9373	18.243	18.7124	19.5155	21.3593	19.086	19.9869
6	17.437	18.5857	16.7193	17.5807	17.667	19.609	15.287	17.521
7	19.113	21.533	20.1433	20.2631	21.776	23.6103	21.8047	22.397
8	18.123	20.2383	17.943	18.7681	19.259	21.1553	18.389	19.6011
9	17.967	19.1307	17.963	18.3536	17.747	20.017	18.226	18.6633
10	18.484	18.9937	17.3433	18.2737	17.793	19.4893	16.245	17.8424
11	18.877	19.263	18.338	18.826	18.378	20.3397	19.0947	19.2708
12	17.578	18.4993	17.071	17.7161	17.307	19.0597	17.0055	17.7907
13	16.408	17.568	16.4333	16.8031	16.574	18.3773	16.6323	17.1946
14	17.646	19.256	17.7473	18.2164	18.488	20.4783	17.894	18.9534
15	17.208	17.712	16.259	17.0597	15.991	17.754	15.6145	16.4532
16	17.219	19.1877	17.2797	17.8954	18.714	20.5787	17.152	18.8149
17	18.078	18.456	16.9095	17.8145	17.646	19.1387	17.371	18.0519
18	18.436	20.3895	18.7825	19.2027	20.053	22.053	19.3465	20.4842
19	16.1	16.7423	16.5195	16.4539	15.4185	17.2193	17.134	16.5906
20	18.161	19.0463	17.2573	18.1549	18.167	20.4713	15.78	18.1394
21	17.088	19.2877	17.532	17.9692	18.6915	20.477	17.4897	18.8861
22	17.089	17.3177	16.4413	16.9493	15.9265	18.038	16.6597	16.8747
23	17.861	18.65	18.243	18.2513	17.881	20.029	19.315	19.075
24	16.012	16.616	15.5917	16.0732	14.454	16.5413	14.67	15.2218
25	18.078	19.3207	17.1667	18.1884	18.7175	20.7813	16.8533	18.7841
26	16.604	18.0923	17.3707	17.3557	16.9325	18.9557	18.2333	18.0405
27	17.238	18.68	17.6903	17.8694	17.8945	19.7467	18.2717	18.6376
28	17.272	18.7333	17.5047	17.8367	16.791	19.3043	17.892	17.9958
29	17.159	18.3963	17.082	17.5458	17.5465	19.7813	17.631	18.3196
30	16.602	17.3433	16.5183	16.8212	15.721	17.4477	16.4493	16.5393
31	17.925	18.8663	17.1545	17.9819	18.2965	20.531	16.78	18.5358
32	17.809	18.7577	17.5	18.0222	18.3815	20.4693	17.9935	18.9481
33	16.409	17.1503	16.1343	16.5646	15.192	17.2153	15.732	16.0464
34	16.239	16.6563	16.0485	16.3146	15.3355	16.98	15.6745	15.9967
35	18.106	19.0417	17.5385	18.2287	18.391	20.51	17.0895	18.6635
36	19.4	20.255	17.5017	19.0522	20.0115	21.9893	17.739	19.9133
37	16.735	18.0497	17.0767	17.2871	16.8085	18.9547	18.16	17.9744
38	17.151	17.9447	16.6787	17.2581	16.9555	19.1833	16.648	17.5956
39	17.063	19.026	17.8273	17.9721	17.674	19.807	18.4627	18.6479
40	17.757	19.425	17.586	18.256	19.0095	21.083	16.8423	18.9783
41	16.648	17.776	17.674	17.366	15.9475	18.2493	18.564	17.5869
42	17.629	19.006	16.918	17.851	18.017	20.421	15.4273	17.9551
43	15.899	16.7403	15.7247	16.1213	14.8785	16.7887	14.203	15.2901
44	17.743	18.773	17.4	17.972	17.861	20.0157	16.9	18.2589
45	17.353	19.3857	17.8007	18.1798	19.139	21.2927	18.3777	19.6031
46	16.407	17.6577	16.2187	16.7611	16.7865	18.8977	15.5643	17.0828
47	16.202	17.0277	16.099	16.4429	15.456	17.3663	16.3733	16.3986
48	16.251	16.9027	16.144	16.4326	15.355	17.0347	15.8045	16.0647
49	17.339	18.6457	17.5995	17.8614	17.8595	19.6213	18.576	18.6856
50	17.758	18.8917	17.483	18.0442	18.3965	20.28	17.2617	18.6461
51	17.312	18.7643	17.566	17.8808	18.163	20.2087	18.1823	18.8513
52	16.841	17.7757	17.1497	17.2554	16.2445	18.413	17.466	17.3745
53	17.429	18.743	17.336	17.836	17.752	19.7777	17.1587	18.2294
54	15.996	17.4377	16.6177	16.6838	15.8305	18.167	16.148	16.7152
55	18.025	19.143	17.341	18.1697	18.2335	20.424	17.1143	18.5906
56	16.127	16.9923	16.0967	16.4053	15.276	17.304	16.423	16.3343
57	16.698	17.5457	16.429	16.8909	16.4095	18.382	16.4117	17.0677
58	15.708	16.702	16.055	16.155	14.6625	16.6527	16.3205	15.8786
59	16.616	17.44	16.0497	16.7019	15.814	17.898	15.2783	16.3301
60	16.326	16.7443	15.8273	16.2992	15.371	17.2347	16.0167	16.2074
61	17.948	18.6187	17.3407	17.9691	18.188	20.2587	17.9963	18.8143
62	17.11	17.929	16.867	17.302	16.193	18.3053	16.6943	17.0642
63	17.935	18.522	17.3935	17.9502	17.2465	19.2465	17.2965	17.9298
64	16.35	16.8733	16.192	16.4718	15.141	17.123	16.2523	16.1721
65	17.127	17.7237	16.555	17.1352	16.7505	18.6543	16.5387	17.3145
66	16.555	17.0637	16.7413	16.7867	15.6795	17.8123	17.6443	17.0454
67	17.827	19.2843	18.4935	18.5349	18.2715	20.356	19.6205	19.416
68	17.468	18.558	17.488	17.838	16.918	19.008	17.1683	17.6981
69	17.234	17.7593	16.8533	17.2822	16.6915	18.7517	17.9487	17.7973
70	16.313	17.0557	16.7487	16.7058	14.89	16.966	17.5047	16.4536
71	17.643	18.478	17.5975	17.9062	17.8325	19.599	18.574	18.6685
72	18.491	19.688	18.2585	18.8125	19.0535	20.9967	18.5	19.5167
73	16.131	17.2407	16.0475	16.4731	15.64	17.539	15.485	16.2213
74	18.285	19.7793	17.4495	18.5046	18.607	20.7713	17.4745	18.9509
75	17.726	18.909	17.6623	18.0991	17.603	20.1757	17.9197	18.5661
76	18.037	19.2367	18.3687	18.5474	18.356	20.5193	19.4753	19.4502
77	16.388	17.1227	16.2783	16.5963	15.3435	17.515	15.9693	16.2759
78	17.624	18.112	17.2643	17.6668	16.225	18.216	17.3157	17.2522
79	17.74	19.188	18.082	18.3367	18.69	20.728	18.798	19.4053
80	17.937	18.488	17.498	17.9743	17.6315	19.6767	18.065	18.4577
81	16.219	16.7917	15.733	16.2479	15.1145	17.146	14.9533	15.7379
82	17.348	19.304	18.1943	18.2821	18.1145	20.2887	19.4473	19.2835
83	18.345	19.6367	18.0283	18.67	18.4175	20.893	18.5083	19.2729
84	17.545	19.4383	18.6757	18.553	19.224	21.4923	20.532	20.4161
85	16.072	17.0383	16.1305	16.4136	14.742	17.0683	16.069	15.9598
86	16.26	17.6213	16.387	16.7561	16.364	18.393	16.8887	17.2152
87	15.72	16.8573	15.9883	16.1886	15.4835	17.7183	16.221	16.4743
88	17.194	18.7227	17.8165	17.9111	18.078	20.326	18.909	19.1043
89	17.821	18.4533	17.611	17.9618	17.7065	19.7277	18.271	18.5684
90	16.364	16.8497	17.0287	16.7474	14.942	17.1013	18.062	16.7018
91	16.696	18.1743	17.5207	17.4637	17.1405	19.3103	18.9513	18.4674
92	17.711	18.4977	17.2093	17.806	17.558	19.6147	17.4477	18.2068
93	17.23	18.421	17.6653	17.7721	16.788	19.0197	17.7727	17.8601
94	17.39	19.0247	17.6523	18.0223	18.2375	20.4007	17.5947	18.7443
95	17.952	18.5053	17.384	17.9471	17.407	19.5927	17.0063	18.002
96	*	18.263	17.331	17.797	*	19.2553	17.6313	18.4433
97	*	17.6317	16.7507	17.1912	*	18.3967	17.4813	17.939
98	16.139	17.1397	16.5947	16.6244	15.585	17.6163	17.035	16.7454
99	15.977	16.996	15.86	16.2777	14.9575	16.8913	15.607	15.8186
100	16.995	18.6343	17.2367	17.622	17.765	20.0157	17.51	18.4302
101	16.059	16.767	15.8953	16.2404	15.3105	17.309	16.0317	16.2171
102	19.781	20.783	20.2693	20.2778	20.857	23.1157	22.8603	22.2777
103	16.508	16.8727	16.0357	16.4721	15.1965	17.3633	16.5343	16.3647
104	15.957	16.647	15.969	16.191	14.765	16.9107	15.5477	15.7411
105	16.202	17.3883	16.2883	16.6262	15.5405	17.6773	16.231	16.4829
106	17.82	19.0657	18.0803	18.322	18.0665	20.2623	18.7573	19.0287
107	17.347	18.4345	17.7343	17.8386	17.545	19.6125	18.8153	18.6576
108	17.339	18.6583	17.386	17.7944	17.6885	19.748	18.131	18.5225
109	17.251	18.3977	17.761	17.8032	18.364	20.304	18.959	19.209
110	17.521	18.547	17.5123	17.8601	17.6925	19.5737	18.626	18.6307
111	17.103	17.3657	16.7497	17.0728	16.4765	18.3713	17.729	17.5256
112	*	17.2747	16.4127	16.8437	*	17.1937	15.585	16.3893
113	16.875	18.9113	18.3243	18.0369	17.77	19.9913	19.242	19.0011
114	16.433	18.5097	17.4117	17.4514	17.555	19.603	17.2943	18.1508
115	17.984	17.4383	15.9627	17.1283	15.3925	17.4353	15.9293	16.2524
116	16.72	19.533	18.9493	18.4008	18.897	20.9813	21.1573	20.3452
117	17.507	17.669	16.8653	17.3471	16.956	18.8	17.593	17.783
118	18.737	18.5143	17.5263	18.2592	17.171	19.4017	18.184	18.2522
119	16.327	17.3923	16.9313	16.8836	16.1455	17.9187	18.063	17.3757
120	16.484	17.2787	16.198	16.6536	15.8455	17.7567	16.2613	16.6212
121	17.486	19.1973	17.4907	18.058	18.563	20.76	17.405	18.9093
122	16.984	18.7043	17.4783	17.7222	18.4045	20.5817	18.6753	19.2205
123	17.171	18.9567	17.664	17.9306	17.5035	19.6063	17.808	18.3059
124	16.769	18.3867	17.6447	17.6001	17.513	19.5863	19.015	18.7048
125	17.628	18.2207	17.9043	17.9177	17.241	19.3193	19.101	18.5538
126	17.862	19.7657	18.2077	18.6118	19.168	21.226	18.6723	19.6888
127	17.003	17.998	16.666	17.2223	17.3855	19.3693	17.3747	18.0432
128	17.469	19.0197	17.1497	17.8794	18.008	20.2193	16.8573	18.3616
129	17.694	19.2353	17.8917	18.2737	18.292	20.3313	18.033	18.8854
130	18.628	20.5173	18.5287	19.2247	20.243	22.3543	19.6077	20.735
131	17.3	18.4067	17.2863	17.6643	16.634	19.1483	17.0113	17.5979
132	17.693	18.5993	17.4633	17.9186	17.8835	20.0757	17.1793	18.3795
133	17.051	18.008	16.6163	17.2251	16.49	18.6893	16.8227	17.334
134	17.277	18.8027	17.491	17.8569	17.1955	19.4067	18.2923	18.2982
135	16.612	17.8405	17.3227	17.2584	16.311	18.311	18.4323	17.6848
136	18.013	18.9563	18.1217	18.3637	18.0955	20.42	18.7353	19.0836
137	16.874	17.7187	16.6513	17.0813	16.1345	18.143	16.023	16.7668
138	17.06	18.177	16.4353	17.2241	17.3135	19.6087	16.1837	17.7019
139	16.94	18.066	16.8553	17.2871	17.321	19.5537	18.1313	18.3353
140	15.444	18.0287	17.1283	16.867	17.614	19.3163	17.4993	18.1432
141	17.632	19.3413	17.486	18.1531	18.5485	20.4503	16.2157	18.4048
142	16.422	17.8123	17.287	17.1738	16.897	18.893	18.2177	18.0026
143	18.535	18.7775	18.8657	18.7261	18.6555	20.6555	21.358	20.223
144	17.552	18.2683	17.7065	17.8423	17.319	19.4823	18.4375	18.4129
145	17.199	19.1633	17.6883	18.0169	18.582	20.6797	19.0807	19.4474
146	16.812	18.3683	16.5725	17.2509	17.041	19.2617	15.8485	17.3837
147	19.39	19.4087	17.6	18.7996	19.1745	21.2457	18.5607	19.6603
148	15.241	16.8103	15.8147	15.9553	15.2805	17.152	15.919	16.1172
149	15.847	16.3327	16.0727	16.0841	14.537	16.5043	15.808	15.6164
150	17.282	18.4627	17.6267	17.7904	17.362	19.4517	18.3403	18.3847
151	16.73	18.4373	17.2287	17.4653	17.089	19.1943	17.6133	17.9656
152	18.223	19.36	17.9433	18.5088	18.9825	20.9607	18.5317	19.4916
153	18.04	19.5107	18.087	18.5459	19.6095	21.1883	18.4843	19.7607
154	16.53	16.8193	15.688	16.3458	15.541	17.3853	15.443	16.1231
155	17.148	18.23	17.285	17.5543	17.012	19.3587	17.368	17.9129
156	20.011	21.37	18.7927	20.0579	22.925	24.8987	20.0763	22.6333
157	16.123	16.762	15.915	16.2667	14.7925	16.9557	16.155	15.9677
158	17.998	18.8497	18.0537	18.3004	18.3725	20.4523	19.1547	19.3265
159	15.626	16.6227	15.49	15.9129	15.1585	17.151	15.519	15.9428
160	17.647	19.1417	18.128	18.3056	18.5845	20.6443	18.0993	19.1094
161	17.861	18.751	18.4597	18.3572	17.8905	19.8093	19.966	19.2219
162	17.338	18.2925	17.9953	17.8753	18.189	20.1325	19.7683	19.3633
163	16.567	17.2803	16.512	16.7864	16.4525	18.3467	16.5777	17.1256
164	17.496	18.8797	17.4357	17.9371	18.321	20.2553	17.8057	18.794
165	15.964	17.337	15.808	16.3697	15.789	17.7803	15.5897	16.3863
166	16.836	18.0747	17.4147	17.4418	17.5225	19.3753	18.1757	18.3578
167	17.189	17.877	17.0363	17.3674	16.737	18.757	17.375	17.623
168	17.944	19.1217	17.7663	18.2773	19.295	21.1847	18.916	19.7986
169	16.943	18.6873	17.488	17.7061	17.288	19.647	17.7953	18.2434
170	16.488	17.3593	16.873	16.9068	16.4135	18.3437	18.0083	17.5885
171	19.025	20.3117	18.0407	19.1258	19.942	21.706	18.539	20.0623
172	16.624	17.9567	17.2607	17.2804	16.9035	19.0273	18.712	18.2143
173	17.825	18.1517	17.232	17.7362	16.843	18.737	17.0897	17.5566
174	17.873	19.0613	17.8683	18.2676	18.005	20.1523	17.5805	18.5793
175	18.093	19.0103	17.5063	18.2032	18.4425	20.4343	17.516	18.7976
176	17.909	19.163	18.0823	18.3848	18.5005	20.6517	17.9933	19.0485
177	19.686	21.0857	18.7597	19.8438	21.7875	23.85	20.3727	22.0034
178	19.278	20.181	19.0643	19.5078	19.5455	21.6653	19.9803	20.3971
179	18.109	19.4163	18.4003	18.6419	19.5145	21.5037	19.8523	20.2902
180	17.475	19.2937	17.645	18.1379	17.9215	19.9203	18.1267	18.6562
181	*	18.1123	17.3097	17.711	*	19.156	17.4987	18.3273
182	18.041	18.2257	17.345	17.8706	17.124	19.009	17.3153	17.8161
183	19.205	20.166	18.0933	19.1548	19.4095	21.867	18.8727	20.0497
184	17.836	18.0983	17.328	17.7541	17.3135	19.3737	17.9673	18.2182
185	16.838	17.8037	17.2503	17.2973	16.274	18.2847	17.716	17.4249
186	17.695	19.3287	17.696	18.2399	18.5275	20.506	17.5437	18.8591
187	*	18.3137	17.212	17.7628	*	19.3603	17.1777	18.269
188	17.568	18.8657	17.1793	17.871	17.8545	19.8797	17.074	18.2694
189	17.19	17.7147	16.5613	17.1553	17.049	18.659	16.9553	17.5544
190	17.484	18.3433	17.5947	17.8073	16.4315	18.229	17.3327	17.3311
191	17.206	17.9307	17.266	17.4676	16.9675	18.9547	17.89	17.9374
192	17.959	19.041	17.137	18.0457	18.4555	20.429	17.2813	18.7219
193	15.324	16.8987	15.5957	15.9394	15.0365	16.891	15.7957	15.9077
194	15.856	17.065	15.8523	16.2578	15.245	17.3843	16.1683	16.2659
195	17.735	19.3003	18.398	18.4778	19.011	20.953	19.7947	19.9196
196	16.956	18.757	17.3393	17.6841	17.769	19.737	17.348	18.2847
197	17.52	18.2267	17.3697	17.7054	16.653	18.5617	17.344	17.5196
198	16.032	17.211	16.3553	16.5328	16.166	18.1407	16.6787	16.9951
199	17.437	20.2415	17.9823	18.5536	19.241	21.241	18.2373	19.5731
200	17.586	20.081	18.7453	18.8041	20.093	22.1873	20.028	20.7694
201	16.988	18.3703	17.37	17.5761	16.9445	19.02	17.095	17.6865
202	17.191	18.3643	17.418	17.6578	17.3565	19.1673	17.662	18.0619
203	17.907	18.958	17.7947	18.2199	18.4035	20.2177	18.6983	19.1065
204	18.031	20.5193	19.114	19.2214	19.687	21.6797	21.8807	21.0824
205	17.546	19.169	18.1457	18.2869	18.8815	20.7593	19.7223	19.7877
206	16.806	18.126	17.314	17.4153	17.53	19.375	18.5663	18.4904
207	17.481	19.3133	17.3405	18.0449	18.918	20.888	17.037	18.9477
208	*	17.465	16.044	16.7545	*	18.4	16.5847	17.4923
209	*	20.7965	17.4713	19.1339	*	22.353	17.3293	19.8412
210	16.803	18.058	17.1893	17.3501	17.013	19.0807	17.528	17.8739
211	17.828	18.3807	17.449	17.8859	17.1495	19.234	17.729	18.0375
212	16.763	18.0503	17.584	17.4658	17.3415	19.4547	19.0367	18.6109
213	18.387	20.1773	18.294	18.9528	18.887	20.8853	19.1037	19.6253
214	18.027	19.177	18.0397	18.4146	17.888	20.0563	18.0043	18.6496
215	17.931	19.5987	18.9333	18.821	20.0065	21.8453	20.4767	20.7762
216	17.659	18.9823	17.155	17.9321	18.2365	20.3273	16.226	18.2633
217	19.646	20.6627	19.4733	19.9273	20.8695	22.629	21.125	21.5412
218	17.408	19.8087	18.5557	18.5908	19.482	21.2017	19.7897	20.1578
219	16.762	16.682	16.1837	16.5426	15.41	17.2787	16.5033	16.3973
220	17.889	18.8053	17.3953	18.0299	18.093	19.9377	18.0673	18.6993
221	16.905	17.229	16.0887	16.7409	16.0615	17.6403	15.5393	16.4137
222	15.402	16.3993	15.707	15.8361	14.136	16.1003	15.2077	15.148
223	17.639	18.9923	17.863	18.1648	18.374	20.2967	18.55	19.0736
224	17.136	18.6063	17.0233	17.5886	17.983	20.1863	18.1493	18.7729
225	18.122	18.8653	18.349	18.4454	18.26	20.5573	19.9393	19.5856
226	17.17	18.4013	17.3947	17.6553	17.9775	19.9757	18.3033	18.7522
227	16.413	18.022	16.633	17.0227	17.914	19.704	17.6413	18.4198
228	16.583	18.1827	17.737	17.5009	16.9115	18.9807	18.8527	18.2483
229	16.695	17.7757	16.9703	17.147	16.661	18.6457	17.5943	17.6337
230	17.88	19.141	17.699	18.24	18.9565	20.6933	17.4457	19.0318
231	17.216	18.5167	17.2007	17.6444	18.0645	19.7403	17.595	18.4666
232	15.662	16.7047	16.1493	16.172	15.21	17.3827	16.7687	16.4538
233	16.844	18.61	17.727	17.727	17.915	19.8587	19.1283	18.9673
234	17.522	19.1533	17.8797	18.185	18.68	20.654	18.201	19.1783
235	16.99	17.3077	16.6703	16.9893	15.655	17.772	17.628	17.0183
236	17.544	17.885	17.0047	17.4779	16.7675	18.5077	17.3523	17.5425
237	18.145	18.2957	17.803	18.0812	17.637	19.6923	19.172	18.8338
238	17.472	18.1477	17.005	17.5416	16.517	18.6293	15.8397	16.9953
239	17.442	18.1097	16.8723	17.4747	17.5015	19.4047	17.1	18.0021
240	17.044	17.2067	16.8867	17.0458	15.7075	17.5197	17.317	16.8481
241	17.565	19.2547	17.5765	18.1321	19.8285	21.3487	18.9905	20.0559
242	16.946	17.8947	16.985	17.2752	16.914	18.6387	17.018	17.5236
243	17.966	18.804	17.5333	18.1011	18.684	20.154	17.5117	18.7832
244	17.47	17.9257	16.9847	17.4601	16.824	18.836	17.5667	17.7422
245	17.84	18.1803	17.3887	17.803	17.082	18.7567	17.4973	17.7787
246	15.826	16.6723	15.5333	16.0106	15.2265	17.023	15.4573	15.9023
247	*	19.464	18.5613	19.0127	*	21.5163	20.1147	20.8155
248	17.463	18.3383	17.496	17.7658	16.846	18.8707	17.7325	17.8164
249	17.822	19.4463	17.4497	18.2393	19.145	21.281	16.759	19.0617
250	18.607	20.4953	18.976	19.3594	20.976	22.6583	20.064	21.2328
251	18.137	18.1133	17.6073	17.9526	16.886	18.6743	18.2173	17.9259
252	*	18.759	17.9285	18.3438	*	20.132	18.7505	19.4413
253	15.916	17.9107	16.389	16.7386	16.653	18.655	17.2083	17.5054
254	18.942	19.987	18.464	19.131	20.2955	22.294	20.3897	20.9931
255	17.905	19.361	17.83	18.3653	18.398	20.641	18.8687	19.3026
256	*	19.4537	17.5537	18.5037	*	20.0427	17.632	18.8373
257	18.523	19.1373	18.3103	18.6569	18.6595	20.5017	19.1527	19.4379
258	18.105	18.9733	17.814	18.2974	18.1585	20.253	18.0207	18.8107
259	18.433	19.2323	18.5207	18.7287	19.33	21.1713	19.9627	20.1547
260	16.481	17.6393	16.6597	16.9267	16.439	18.3397	17.2543	17.3443
261	18.559	18.5733	18.0083	18.3802	18.303	19.9007	19.301	19.1682
262	16.022	17.2693	16.6975	16.6629	16.0575	18.2707	17.407	17.2451
263	16.555	17.973	16.7957	17.1079	16.6925	18.7607	17.1387	17.5306
264	15.813	16.2387	15.456	15.8359	14.4055	16.262	14.8603	15.1759
265	17.416	17.7457	16.8267	17.3294	17.3545	19.3097	17.9343	18.1995
266	15.839	17.417	15.9943	16.4168	16.3015	18.1213	16.018	16.8136
267	16.195	17.501	16.6947	16.7969	16.3715	18.4217	17.6453	17.4795
268	17.696	18.8633	17.1713	17.9102	18.201	20.0637	17.08	18.4482
269	15.837	18.5253	17.797	17.3864	17.6165	19.824	19.2207	18.8871
270	18.342	20.778	18.7823	19.3008	21.3335	23.3067	20.364	21.6681
271	17.931	19.135	17.9275	18.3312	19.07	21.067	19.6425	19.9265
272	17.589	18.1283	17.9697	17.8957	17.5635	19.7017	19.625	18.9634
273	17.84	18.6297	17.9327	18.1341	18.4725	20.2953	19.2513	19.3397
274	16.002	16.386	15.2703	15.8861	14.9245	17.019	15.173	15.7055
275	16.657	17.0573	16.8097	16.8413	15.7075	17.5097	17.156	16.7911
276	16.972	17.3373	16.9447	17.0847	16.1045	17.8627	17.5187	17.1619
277	17.488	18.5687	16.941	17.6659	17.2985	19.5867	17.4413	18.1088
278	16.512	17.6267	17.0537	17.0641	16.7385	18.5337	17.8463	17.7062
279	20.747	19.1597	18.465	19.4572	18.7685	20.7703	19.9937	19.8442
280	16.546	17.1013	16.376	16.6744	15.955	17.867	16.874	16.8987
281	16.05	17.7533	16.89	16.8978	16.323	18.3223	17.927	17.5241
282	17.483	17.983	17.4783	17.6481	16.9345	18.6887	18.5967	18.0733
283	16.332	16.7053	16.1053	16.3809	15.4815	17.4847	16.875	16.6137
284	17.693	18.971	17.6807	18.1149	18.368	20.0723	17.7673	18.7359
285	16.536	17.573	17.1187	17.0759	16.7845	18.904	18.468	18.0522
286	19.337	19.7657	18.9357	19.3461	20.7625	22.4643	21.3113	21.5127
287	17.859	18.6083	17.8137	18.0937	18.2305	20.211	19.4153	19.2856
288	17.615	18.9627	17.7677	18.1151	17.638	19.8143	17.7523	18.4016
289	17.654	18.2243	17.23	17.7028	17.4275	19.4363	18.005	18.2896
290	18.202	16.4527	15.5163	16.7237	15.31	17.298	15.6743	16.0941
291	15.676	16.951	16.298	16.3083	15.5725	17.6763	16.7153	16.6547
292	16.115	16.839	15.8993	16.2844	15.598	17.485	15.8293	16.3041
293	17.295	18.8147	17.3507	17.8201	18.853	20.1053	18.2027	19.0537
294	17.524	18.7447	18.244	18.1709	18.559	20.5853	19.3323	19.4922
295	16.572	18.0123	16.9707	17.185	17.005	19.1343	17.3227	17.8207
296	17.199	18.2887	16.9627	17.4834	17.1905	19.1603	17.997	18.1159
297	16.682	18.611	16.776	17.3563	17.1805	19.1727	16.722	17.6917
298	18.023	18.4643	17.9023	18.1299	17.733	19.7583	19.0073	18.8329
299	16.53	17.69	17.15	17.1233	17.1585	19.2333	18.7503	18.3807
300	16.732	18.1273	17.1657	17.3417	17.0535	19.1823	18.3537	18.1965
301	18.059	19.5267	16.6853	18.0903	19.4115	21.4013	15.7527	18.8552
302	15.61	16.341	15.5713	15.8408	14.513	16.2917	15.4473	15.4173
303	20.451	21.225	20.008	20.5613	22.6835	24.462	22.0733	23.0729
304	17.476	18.607	17.4695	17.8508	18.835	20.4413	18.9215	19.3993
305	16.937	17.878	17.1	17.305	16.37	18.3393	17.6557	17.455
306	17.449	19.1663	18.281	18.2988	19.136	21.1097	20.264	20.1699
307	17.531	19.4127	17.6557	18.1998	19.882	21.9177	18.181	19.9936
308	16.218	17.1393	16.2713	16.5429	15.941	17.822	16.5377	16.7669
309	17.433	18.5773	17.3517	17.7873	18.235	20.1357	17.947	18.7726
310	16.311	17.518	16.9557	16.9282	16.519	18.2137	17.4657	17.3994
311	18.312	20.0243	17.745	18.6938	19.7045	21.6993	17.89	19.7646
312	17.97	19.2067	18.3145	18.4971	18.719	20.5823	19.662	19.6544
313	17.981	19.2773	18.3393	18.5326	19.4145	21.4447	20.3537	20.4043
314	17.768	18.2833	17.6695	17.9069	17.619	19.6787	18.897	18.7316
315	19.962	20.7583	19.442	20.0541	21.038	23.1067	20.246	21.4636
316	18.478	19.8703	18.868	19.0721	19.8105	21.857	20.6407	20.7694
317	16.154	17.7157	17.194	17.0212	16.796	18.6597	18.5547	18.0034
318	18.835	19.1857	19.1607	19.0604	19.181	21.1717	21.7633	20.7053
319	17.986	19.1423	18.1467	18.425	19.1095	21.0467	19.342	19.8327
320	16.599	18.7557	17.026	17.4602	17.296	19.4963	17.6223	18.1382
321	16.696	17.7743	16.8963	17.1222	17.113	19.1293	17.654	17.9654
322	18.883	20.257	18.7303	19.2901	20.1605	22.1605	20.0837	20.8016
323	16.766	18.2153	17.0007	17.3273	17.214	19.445	17.1937	17.9509
324	20.225	21.2313	17.1137	19.5233	22.173	24.2333	17.4063	21.2709
325	17.356	18.9087	18.438	18.2342	17.6985	19.3727	20.232	19.1011
326	19.678	20.1413	18.6843	19.5012	20.4575	22.1653	19.6207	20.7478
327	19.243	20.4927	18.9737	19.5698	21.4365	23.3683	20.724	21.8429
328	19.619	20.8273	19.3173	19.9212	21.3655	23.4283	21.6563	22.1501
329	18.978	20.29	18.2493	19.1724	20.3345	22.207	18.5457	20.3624
330	17.794	19.5343	18.4533	18.5939	19.7825	21.862	20.4157	20.6867
331	17.977	19.3857	18.4453	18.6027	18.914	20.9683	20.668	20.1834
332	18.745	19.0173	18.4177	18.7267	18.981	21.0383	20.2023	20.0739
333	17.426	18.7097	18.269	18.1349	17.8965	20.223	20.1883	19.4359
334	16.789	17.677	17.0815	17.1825	16.069	18.1893	18.366	17.5414
335	20.034	20.5303	19.224	19.9294	21.2305	23.0403	21.163	21.8113
336	19.321	20.074	18.7997	19.3982	20.4645	22.1247	20.5623	21.0505
337	16.278	17.3503	16.6057	16.7447	16.825	18.659	17.616	17.7
338	18.336	20.2173	19.3087	19.2873	20.838	22.685	21.6327	21.7186
339	19.501	20.5837	19.6277	19.9041	21.6145	23.257	22.4747	22.4487
340	18.785	19.956	18.6437	19.1282	20.3105	22.022	19.5317	20.6214
341	17.969	19.064	18.242	18.425	18.959	20.5915	20.038	19.8628
342	18.332	19.8923	18.219	18.8144	20.5485	22.6547	19.9763	21.0598
343	16.706	17.7413	16.6217	17.023	16.9855	18.9653	17.552	17.8343
344	17.264	19.1947	18.5113	18.3233	19.014	20.7303	20.4047	20.0497
345	16.801	17.803	17.124	17.2427	16.478	18.4203	17.9043	17.6009
346	16.342	18.3233	17.2193	17.2949	17.896	19.909	18.693	18.8327
347	17.068	18.4463	17.5813	17.6986	17.4585	19.4717	18.8293	18.5865
348	19.337	20.7767	18.894	19.6692	21.665	23.607	20.2603	21.8441
349	20.15	21.408	19.7113	20.4231	22.37	24.5373	20.982	22.6298
350	17.972	19.655	18.5753	18.7341	19.5595	21.6397	20.0827	20.4273
351	15.94	17.4957	17.107	16.8476	16.2695	18.2347	18.636	17.7134
352	17.409	18.155	17.3053	17.6231	17.125	19.0247	17.245	17.7982
353	18.623	20.171	18.8157	19.2032	20.5745	22.3783	21.0577	21.3368
354	18.588	20.9823	18.9583	19.5096	21.1935	22.958	20.3	21.4838
355	16.091	17.468	17.2923	16.9504	16.14	18.5393	19.242	17.9738
356	16.963	18.6203	17.474	17.6858	17.907	20.2203	18.405	18.8441
357	18.222	18.966	18.231	18.473	18.688	20.6953	20.348	19.9104
358	16.878	18.7047	17.642	17.7416	18.631	20.653	19.2847	19.5229
359	17.132	18.8713	17.5647	17.856	18.3485	20.3877	18.5333	19.0898
360	17.361	19.2867	18.254	18.3006	19.0415	21.0137	20.0457	20.0336
361	18.886	20.2943	19.1593	19.4466	19.9955	21.9973	21.618	21.2036
362	18.723	19.7243	18.446	18.9644	19.503	21.512	20.7493	20.5881
363	18.511	20.2077	18.4935	19.0707	20.3595	22.1993	20.35	20.9696
364	19.241	20.45	18.524	19.405	20.5295	22.7843	18.84	20.7179
365	17.321	19.3593	18.023	18.2344	19.2345	21.3513	19.838	20.1413
366	18.282	19.2163	18.0443	18.5142	19.08	21.052	19.4017	19.8446
367	16.842	17.6663	16.604	17.0374	16.8955	18.9907	17.0703	17.6522
368	18.553	19.749	18.871	19.0577	19.792	21.8427	21.059	20.8979
369	16.309	17.9573	16.888	17.0514	17.1735	19.1483	17.4473	17.9231
370	16.765	17.671	17.1453	17.1938	16.307	18.417	18.055	17.593
371	18.927	20.8387	19.518	19.7612	21.734	24.0773	21.826	22.5458
CN18	17.159	18.138	16.9707	17.4226	17.547	19.0013	17.5647	18.0377
T1208	17.459	19.0237	17.528	18.0036	17.767	20.6387	17.7053	18.7037
