# Supplementary material for: QTL Mapping and Validation for Kernel Area and Circumference in Common Wheat via High-Density SNP-Based Genotyping
Source: Front Plant Sci. 2021 Aug 17;12:713890. doi: 10.3389/fpls.2021.713890 (PMC8415916; doi:10.3389/fpls.2021.713890)
Supplement: Supplementary file 3 [file Table_3.XLSX]

## Sheet: Sheet1
Table S3 All of the QTLs in this study for the kernel-size traits in different environment
Traits	QTL	Year	Interval(cM)	Flanking marker		LOD	PVE	Add
KC	QKc.sau-1A	Mean	54.64-55.20	AX-111149806	AX-111064559	5.2024	1.5772	-0.1154
	QKc.sau-2A	2018	147.62-148.33	AX-111014053	AX-109504931	11.9878	7.5249	0.2169
		Mean	147.62-148.33	AX-111014053	AX-109504931	8.194	2.5015	0.1348
	QKc.sau-2B	2016	203.50-208.12	AX-111563183	AX-110426897	5.9906	3.3759	0.1418
	QKc.sau-2D.1	2016	54.94-55.09	AX-110558245	AX-110010295	5.4243	3.0008	0.1356
	QKc.sau-2D.2	2019	297.61-299.08	AX-86176576	AX-109038086	10.5622	5.7423	0.1881
		Mean	295.05-297.61	AX-111045643	AX-86176576	10.8519	3.4597	0.1582
	QKc.sau-3D.1	2016	54.70-58.40	AX-108923200	AX-109333872	27.1076	17.5116	0.3226
		Mean	51.63-54.55	AX-111373283	AX-109962767	17.5104	5.7917	0.2042
	QKc.sau-3D.2	2018	157.31-165.40	AX-109826344	AX-110049682	8.8084	6.1303	0.2105
	QKc.sau-3D.3	2016	168.83-169.55	AX-109580758	AX-111699502	5.0259	2.785	0.1404
	QKc.sau-4A.1	2018	71.61-72.79	AX-110488353	AX-110946610	4.756	2.9173	-0.1376
	QKc.sau-4A.2	2018	107.88-108.02	AX-109918502	AX-109273661	6.5974	3.9472	-0.1565
		Mean	107.88-108.02	AX-109918502	AX-109273661	12.8296	4.0491	-0.1708
	QKc.sau-4B.1	2018	67.53-72.39	AX-110472645	AX-110431208	4.4425	2.7103	-0.1428
	QKc.sau-4B.2	Mean	75.93-77.06	AX-111571347	AX-109344792	52.8422	21.5555	-0.4613
	QKc.sau-4B.3	Mean	80.77-85.43	AX-111477393	AX-109637078	27.5185	9.6118	0.2922
	QKc.sau-4D.1	2019	94.86-123.09	AX-108786137	AX-110608439	7.2793	4.5044	0.1709
	QKc.sau-4D.2	2016	262.82-264.47	AX-109535887	AX-112288640	12.9695	7.5688	-0.2123
	QKc.sau-5A.1	2018	56.75-80.36	AX-109467020	AX-108871400	8.0322	8.3084	-0.227
		Mean	56.75-80.36	AX-109467020	AX-108871400	13.9396	7.4367	-0.2317
		2016	80.36-81.22	AX-108871400	AX-108908800	5.1196	2.8004	-0.1323
	QKc.sau-5A.2	2019	115.85-123.50	AX-109330975	AX-111654317	4.2813	2.4013	-0.1233
	QKc.sau-5B.1	2016	150.91-151.20	AX-109321350	AX-110572579	17.0086	10.251	-0.2471
	QKc.sau-5B.2	2018	162.79-163.07	AX-110558483	AX-109386068	10.5393	6.4654	-0.2009
		2019	162.79-163.07	AX-110558483	AX-109386068	8.1597	4.3303	-0.1637
	QKc.sau-5D.1	2018	127.14-128.01	AX-111512258	AX-111875352	4.2215	2.4837	0.1261
	QKc.sau-5D.2	Mean	239.53-245.44	AX-109866923	AX-108876564	12.6124	4.0406	-0.171
	QKc.sau-6A.1	2016	16.78-23.12	AX-110583051	AX-109894590	16.4179	9.768	0.2746
		2018	23.12-31.64	AX-109894590	AX-110126107	36.1119	29.73	0.4932
		2019	23.12-31.64	AX-109894590	AX-110126107	42.6509	34.6775	0.5426
		Mean	23.12-31.64	AX-109894590	AX-110126107	37.2723	14.8184	0.3743
	QKc.sau-6A.2	2019	33.74-46.70	AX-110928314	AX-109538953	18.5145	12.0663	-0.2847
	QKc.sau-6B	Mean	20.65-24.85	AX-111828090	AX-110565716	4.2209	1.2762	-0.096
	QKc.sau-6D	Mean	178.64-187.62	AX-110973960	AX-95217910	5.2736	1.6366	0.1462
	QKc.sau-7A	2016	0.85-17.26	AX-110426647	AX-110383565	4.8496	3.8795	-0.1641
	QKc.sau-7B.1	2019	121.37-122.79	AX-94793127	AX-110477942	4.7104	2.5405	-0.1379
	QKc.sau-7B.2	2016	166.05-169.24	AX-111032744	AX-111496836	7.2891	4.2237	-0.1588
	QKc.sau-7D.1	Mean	103.84-104.70	AX-111000118	AX-109791875	10.0613	3.1078	0.1572
	QKc.sau-7D.2	2016	111.97-112.11	AX-109583841	AX-110276496	16.8402	10.0507	0.2511
KA	QKa.sau-1A	2016	54.64-55.20	AX-111149806	AX-111064559	3.835	1.5685	-0.1943
		Mean	54.64-55.20	AX-111149806	AX-111064559	5.4303	2.4506	-0.2138
	QKa.sau-2A.1	2018	147.62-148.33	AX-111014053	AX-109504931	6.3575	2.2417	0.2186
		Mean	147.62-148.33	AX-111014053	AX-109504931	5.072	2.2822	0.1914
	QKa.sau-2A.2	2016	154.59-156.21	AX-111478907	AX-111736726	7.6065	3.2029	0.2572
	QKa.sau-2D.1	2019	0.84-2.00	AX-109943070	AX-108783825	3.2829	1.574	0.1888
	QKa.sau-2D.2	2019	297.61-299.08	AX-86176576	AX-109038086	4.0522	2.0034	0.2128
	QKa.sau-3D	2016	170.87-173.58	AX-95008504	AX-108814752	10.4868	4.4358	0.331
		2018	170.87-173.58	AX-95008504	AX-108814752	9.3731	3.6191	0.2977
	QKa.sau-4A	2018	107.88-108.02	AX-109918502	AX-109273661	8.5159	3.054	-0.2542
	QKa.sau-4B	2016	67.53-72.39	AX-110472645	AX-110431208	5.2217	2.1677	-0.2311
		2018	67.53-72.39	AX-110472645	AX-110431208	11.8911	4.4415	-0.3375
		Mean	67.53-72.39	AX-110472645	AX-110431208	7.1358	3.4807	-0.2554
	QKa.sau-4D.1	2018	94.86-123.09	AX-108786137	AX-110608439	3.4301	1.2936	0.1704
		2019	94.86-123.09	AX-108786137	AX-110608439	6.4976	5.2394	0.3491
		Mean	94.86-123.09	AX-108786137	AX-110608439	6.5428	4.3671	0.2694
	QKa.sau-4D.2	2016	187.96-188.11	AX-111666852	AX-111463890	4.326	1.7348	0.216
	QKa.sau-5A	2019	115.85-123.50	AX-109330975	AX-111654317	5.2745	2.6129	-0.2451
	QKa.sau-5B	2018	150.91-151.20	AX-109321350	AX-110572579	9.548	3.437	-0.2699
		2019	150.91-151.20	AX-109321350	AX-110572579	10.7234	5.4358	-0.3507
		Mean	150.91-151.20	AX-109321350	AX-110572579	9.6935	4.438	-0.2665
	QKa.sau-5D.1	2016	91.93-101.11	AX-95229410	AX-109174882	8.6978	4.0448	-0.3179
		2018	91.93-101.11	AX-95229410	AX-109174882	5.9488	2.3429	-0.246
		Mean	91.93-101.11	AX-95229410	AX-109174882	11.1866	5.7533	-0.3343
	QKa.sau-5D.2	2018	151.89-164.86	AX-109323365	AX-111817779	9.2181	3.596	0.2769
	QKa.sau-5D.3	2016	232.97-233.11	AX-95629019	AX-111681170	9.7776	4.0598	-0.2884
	QKa.sau-5D.4	2018	263.84-265.90	AX-109839072	AX-109279868	5.5347	2.0336	-0.2118
	QKa.sau-6A.1	2016	16.78-23.12	AX-110583051	AX-109894590	31.4794	16.215	0.6464
		2018	23.12-31.64	AX-109894590	AX-110126107	25.7382	11.9847	0.5805
		Mean	23.12-31.64	AX-109894590	AX-110126107	21.7649	12.3222	0.514
	QKa.sau-6A.2	2016	66.00-66.57	AX-108852271	AX-111808526	41.2388	20.9939	-0.6544
		2018	66.00-66.57	AX-108852271	AX-111808526	47.6111	21.862	-0.6798
		2019	66.00-66.57	AX-108852271	AX-111808526	27.1644	15.1207	-0.584
		Mean	66.00-66.57	AX-108852271	AX-111808526	42.242	23.3999	-0.6111
	QKa.sau-6A.3	2019	66.85-79.35	AX-110040743	AX-109444699	24.4361	15.1587	0.629
	QKa.sau-6D.1	2019	72.00-72.43	AX-111616839	AX-111715289	8.762	4.2844	-0.3209
	QKa.sau-6D.2	2019	100.89-101.18	AX-111540231	AX-89372694	5.1718	2.5113	0.2488
	QKa.sau-6D.3	2016	218.76-219.04	AX-111466043	AX-109316846	29.3904	13.9724	0.5874
		2018	218.76-219.04	AX-111466043	AX-109316846	35.5022	15.0791	0.6195
		Mean	219.48-240.28	AX-109629192	AX-109251918	26.7922	14.2884	0.5224
	QKa.sau-6D.4	2018	240.99-251.05	AX-89643022	AX-108963827	3.4623	1.441	0.1756
	QKa.sau-7D	2019	99.39-100.28	AX-108979749	AX-111535289	9.1147	4.5987	-0.3545
LOD:likelihood of odds.
PVE (%):proportion of phenotypic variation of the corresponding QTL.
ADD:additive effect,Positive additive effects indicate that alleles from T1208 enhance corresponding trait value,and negative additive indicate that alleles from CN18 enhance corresponding trait value.
