# Supplementary material for: QTL Mapping and Validation for Kernel Area and Circumference in Common Wheat via High-Density SNP-Based Genotyping
Source: Front Plant Sci. 2021 Aug 17;12:713890. doi: 10.3389/fpls.2021.713890 (PMC8415916; doi:10.3389/fpls.2021.713890)
Supplement: Supplementary file 4 [file Table_4.XLSX]

## Sheet: Sheet1
Table S4 QTL detected for the kernel-size traits from multienvironment trials（MET）
Traits	cQTL	Position(cM）	LeftMarker	RightMarker	LOD	LOD(A)	LOD(AbyE)	PVE	PVE(A)	PVE(AbyE)	Add
KC	cQKc.sau-2A.1	144	AX-111708024	AX-110034510	9.5431	3.7488	5.7943	2.8758	1.2114	1.6644	0.0627
	cQKc.sau-2A.2	148	AX-111014053	AX-109504931	12.7855	7.1374	5.6481	4.9283	2.2959	2.6324	0.0866
	cQKc.sau-2B	204	AX-111563183	AX-110426897	5.2628	2.6367	2.6262	1.5387	0.8479	0.6909	0.0524
	cQKc.sau-2D	298	AX-86176576	AX-109038086	10.5753	3.3167	7.2587	3.4975	1.0463	2.4512	0.0583
	cQKc.sau-3D.1	54	AX-111373283	AX-109962767	23.7854	9.9441	13.8413	7.6511	3.2065	4.4446	0.102
	cQKc.sau-3D.2	160	AX-109826344	AX-110049682	9.1049	4.0147	5.0901	3.2464	1.3379	1.9085	0.0712
	cQKc.sau-3D.3	169	AX-109580758	AX-111699502	7.9158	5.7678	2.1481	2.4074	1.8476	0.5599	0.0841
	cQKc.sau-4A.1	72	AX-110488353	AX-110946610	6.0165	5.0194	0.9971	2.1547	1.6249	0.5298	-0.0743
	cQKc.sau-4A.2	108	AX-109918502	AX-109273661	6.7271	2.8358	3.8914	2.5493	0.9199	1.6294	-0.0546
	cQKc.sau-4B	73	AX-110431208	AX-111636369	5.236	4.0225	1.2135	1.8774	1.297	0.5804	-0.0726
	cQKc.sau-4D.1	95	AX-108786137	AX-110608439	9.2284	7.304	1.9245	3.0409	2.3534	0.6874	0.0903
	cQKc.sau-4D.2	182	AX-89326174	AX-110479846	7.0115	3.1089	3.9026	2.0852	1.0035	1.0818	0.0641
	cQKc.sau-4D.3	263	AX-109535887	AX-112288640	17.5709	5.3978	12.1732	5.529	1.7334	3.7956	-0.075
	cQKc.sau-5A.1	61	AX-109467020	AX-108871400	7.8513	5.4879	2.3633	2.6256	1.6678	0.9577	-0.0735
	cQKc.sau-5A.2	122	AX-109330975	AX-111654317	5.1527	2.428	2.7247	1.6258	0.7898	0.836	-0.0514
	cQKc.sau-5B.1	151	AX-109321350	AX-110572579	6.9735	4.2862	2.6873	2.0892	1.3872	0.7021	-0.0672
	cQKc.sau-5B.2	163	AX-110558483	AX-109386068	18.8503	15.1493	3.701	6.835	5.0003	1.8347	-0.1278
	cQKc.sau-5B.3	190	AX-109932470	AX-108941296	13.4222	7.0317	6.3905	4.1402	2.3143	1.8259	-0.0888
	cQKc.sau-6A.1	25	AX-109894590	AX-110126107	95.0522	94.9691	0.0831	38.3293	37.3333	0.996	0.4029
	cQKc.sau-6A.2	46	AX-110928314	AX-109538953	19.4852	11.68	7.8052	6.558	3.7646	2.7934	-0.1149
	cQKc.sau-6D	179	AX-110973960	AX-95217910	6.4449	5.2487	1.1962	1.9479	1.6837	0.2641	0.0996
	cQKc.sau-7B.1	122	AX-94793127	AX-110477942	5.3405	3.4192	1.9213	1.7067	1.0702	0.6365	-0.0651
	cQKc.sau-7B.2	166	AX-108908967	AX-111032744	7.8365	0.7922	7.0444	2.3453	0.2564	2.0889	-0.0289
	cQKc.sau-7D	112	AX-109583841	AX-110276496	12.7492	7.7878	4.9615	3.9292	2.5253	1.404	0.0929
KA	cQKa.sau-2A.1	148	AX-111014053	AX-109504931	6.5769	2.9993	3.5776	1.1542	0.6048	0.5493	0.0932
	cQKa.sau-2A.2	155	AX-111478907	AX-111736726	7.8823	3.6219	4.2604	1.5382	0.7323	0.8059	0.1028
	cQKa.sau-2D	11	AX-109444904	AX-109910013	6.1862	3.6027	2.5836	1.1724	0.7206	0.4518	0.1014
	cQKa.sau-3D	172	AX-95008504	AX-108814752	21.4973	13.9234	7.5739	3.9954	2.7818	1.2135	0.2144
	cQKa.sau-4A	108	AX-109918502	AX-109273661	20.1844	11.6867	8.4977	3.8605	2.3901	1.4703	-0.1847
	cQKa.sau-4B.1	72	AX-110472645	AX-110431208	12.1714	5.3247	6.8467	2.1715	1.0923	1.0792	-0.1375
	cQKa.sau-4B.2	78	AX-109457891	AX-110052025	6.2589	3.1899	3.069	1.1831	0.6175	0.5656	-0.1102
	cQKa.sau-4D	97	AX-108786137	AX-110608439	11.3668	11.0692	0.2976	2.4565	2.266	0.1905	0.1848
	cQKa.sau-5A	123	AX-109330975	AX-111654317	9.4832	8.7821	0.701	2.1023	1.7764	0.3259	-0.1607
	cQKa.sau-5B	151	AX-109321350	AX-110572579	33.937	33.5142	0.4228	7.3119	7.2198	0.0921	-0.3213
	cQKa.sau-5D.1	92	AX-95229410	AX-109174882	7.4293	5.1712	2.2581	1.3203	1.0359	0.2844	-0.1344
	cQKa.sau-5D.2	152	AX-109323365	AX-111817779	9.7845	4.9529	4.8317	1.7311	0.9978	0.7334	0.1198
	cQKa.sau-5D.3	265	AX-109839072	AX-109279868	6.3318	3.6246	2.7072	1.111	0.7591	0.3519	-0.1063
	cQKa.sau-6A.1	24	AX-109894590	AX-110126107	41.0684	28.6982	12.3702	8.157	6.1542	2.0028	0.3413
	cQKa.sau-6A.2	66	AX-108852271	AX-111808526	117.565	111.903	5.662	29.3327	29.1998	0.1328	-0.6454
	cQKa.sau-6A.3	79	AX-110040743	AX-109444699	24.0491	11.3367	12.7123	6.6202	2.2556	4.3646	0.1958
	cQKa.sau-6D.1	72	AX-111616839	AX-111715289	9.1978	5.9425	3.2552	2.3353	1.1966	1.1387	-0.1349
	cQKa.sau-6D.2	101	AX-111540231	AX-89372694	5.4254	1.2322	4.1932	1.3338	0.2423	1.0915	0.0615
	cQKa.sau-6D.3	219	AX-111466043	AX-109316846	71.3349	48.0828	23.2521	15.8904	10.6689	5.2215	0.4281
	cQKa.sau-7B	100	AX-108979749	AX-111535289	9.2369	5.0591	4.1779	2.308	0.9839	1.3241	-0.1306
LOD:likelihood of odds.
cQTL:represents QTL identified by combined QTL analysis of multi-environment trials.
LOD (A) and LOD (AbyE): indicate the LOD value for additive and dominance effects and LOD score for additive and dominance by environment effects，respectly.
PVE (A) and PVE (AbyE): represent phenotypic variation explained by additive and dominance effects and additive and dominance by environment effects for corresponding QTL,respectively.
ADD:additive effect,Positive additive effects indicate that alleles from T1208 enhance corresponding trait value,and negative additive indicate that alleles from CN18 enhance corresponding trait value.
