# Supplementary material for: QTL Mapping and Validation for Kernel Area and Circumference in Common Wheat via High-Density SNP-Based Genotyping
Source: Front Plant Sci. 2021 Aug 17;12:713890. doi: 10.3389/fpls.2021.713890 (PMC8415916; doi:10.3389/fpls.2021.713890)
Supplement: Supplementary file 5 [file Table_5.XLSX]

## Sheet: Sheet1
Table S5 Epistatic QTLs analysis for the kernel-related traits by the EPI module
Traits	Year	eQTL1	Position1（cM）	LeftMarker1	RightMarker1	eQTL2	Position2（cM）	LeftMarker2	RightMarker2	LOD	PVE(%)	Add1	Add2	AddbyAdd
KC	2016	eQKc.sau-1A	30	AX-110542887	AX-108991623	eQKc.sau-1BL	20	AX-110516321	AX-111650307	6.0247	12.7831	-0.0917	0.2118	-0.2241
	2016	eQKc.sau-1BL	15	AX-110516321	AX-111650307	eQKc.sau-1BL	20	AX-110516321	AX-111650307	5.5272	14.0735	-0.1193	0.2373	-0.2104
	2016	eQKc.sau-1BL	20	AX-110516321	AX-111650307	eQKc.sau-1D	255	AX-109838442	AX-95181394	5.2202	12.0068	0.2096	-0.0884	-0.2076
	2016	eQKc.sau-1BL	30	AX-111650307	AX-111489813	eQKc.sau-6A	40	AX-110928314	AX-109538953	5.0808	8.5237	0.1276	-0.1642	-0.1903
	2018	eQKc.sau-2B.1	25	AX-109477763	AX-111467209	eQKc.sau-2B.3	145	AX-108807092	AX-109579549	5.5533	8.2972	-0.146	0.018	0.1884
	2018	eQKc.sau-2B.1	25	AX-109477763	AX-111467209	eQKc.sau-2D	255	AX-111593707	AX-109287022	5.3848	9.1731	-0.143	0.011	0.1915
	2018	eQKc.sau-2B.2	110	AX-110603724	AX-110936280	eQKc.sau-4D.1	65	AX-111638900	AX-89515151	6.397	21.2816	0.1798	-0.2671	0.3558
	2018	eQKc.sau-4D.2	125	AX-111970650	AX-110008691	eQKc.sau-6A	45	AX-110928314	AX-109538953	5.3833	8.9127	-0.0431	-0.0315	0.1544
	2018	eQKc.sau-2B.1	25	AX-109477763	AX-111467209	eQKc.sau-7A	45	AX-108947190	AX-111590236	5.3878	10.4633	-0.1495	0.0372	0.2054
KA	2016	eQKa.sau-4A	130	AX-108780049	AX-110667751	eQKa.sau-7B	140	AX-110530584	AX-110551263	5.0769	5.2871	-0.009	-0.045	0.2107
	2016	eQKa.sau-4D	210	AX-110592821	AX-109033420	eQKa.sau-7D.1	185	AX-109920134	AX-94514350	5.2243	6.7308	0.0127	-0.1239	0.2599
	2016	eQKa.sau-4A	130	AX-108780049	AX-110667751	eQKa.sau-7D.2	190	AX-108872235	AX-110998796	5.0634	5.2511	-0.0048	-0.0565	0.209
	2018	eQKa.sau-4D	210	AX-110592821	AX-109033420	eQKa.sau-7D.1	185	AX-109920134	AX-94514350	5.0654	14.3641	0.0657	-0.0997	0.242
eQTL: represents QTL identified by epistatic QTL analysis.
LOD:likelihood of odds.
PVE (%):proportion of phenotypic variation of the corresponding epistatic QTLs.
Add1: QTL1 additive effect.
Add2: QTL2 additive effect.
Add by Add:epistatic effect,the negative values suggests that the epistatic effect of the recombinant genotype was higher than that of the parental genotype.
