# Supplementary material for: QTL Mapping and Validation for Kernel Area and Circumference in Common Wheat via High-Density SNP-Based Genotyping
Source: Front Plant Sci. 2021 Aug 17;12:713890. doi: 10.3389/fpls.2021.713890 (PMC8415916; doi:10.3389/fpls.2021.713890)
Supplement: Supplementary file 6 [file Table_6.XLSX]

## Sheet: Sheet1
Table S6 Genes between the flanking markers of Qka.sau-6A.2 on the physical maps of 6A chromosome of 'CS' and T.turgidum ssp dicoccoides
Physical position in Chinese spring	Gene ID in Chinese spring	Annotation	Physical position in T. turgidum ssp dicoccoides	Gene ID in T. turgidum ssp dicoccoides	Annotation
73298531	TraesCS6A01G104000	SPT2 chromatin protein	72111157	TRIDC6AG013470	30S ribosomal protein S2, chloroplastic
73365652	TraesCS6A01G104100	Probable serine/threonine-protein kinase clkA	72222090	TRIDC6AG013480	SPT 2
73379156	TraesCS6A01G104200	F-box domain-containing protein	72226317	TRIDC6AG013490	Serine/threonine protein phosphatase
73384090	TraesCS6A01G104300	Lipase_GDSL domain-containing protein	72282000	TRIDC6AG013500	Probable serine/threonine-protein kinase clkA
73513303	TraesCS6A01G104400	Serine and arginine repetitive matrix 1	72295465	TRIDC6AG013510	F-box domain-containing protein
73552341	TraesCS6A01G104500	DUF4283 domain-containing protein	72298629	TRIDC6AG013520	Uncharacterized protein
73555985	TraesCS6A01G104600	Uncharacterized protein	72299900	TRIDC6AG013530	GDSL esterase/lipase
73559755	TraesCS6A01G104700	F-box domain-containing protein	72451283	TRIDC6AG013540	Uncharacterized protein
73564100	TraesCS6A01G104800	Transducin family protein / WD-40 repeat family protein	72473270	TRIDC6AG013550	F-box domain-containing protein
73637967	TraesCS6A01G104900	Uncharacterized protein	72475198	TRIDC6AG013560	No hits
73660858	TraesCS6A01G105000	TPR_REGION domain-containing protein	72477926	TRIDC6AG013570	WD repeat-containing protein
73681904	TraesCS6A01G105100	Uncharacterized protein	72550533	TRIDC6AG013580	Uncharacterized protein
73685789	TraesCS6A01G105200	BTB domain-containing protein	72551137	TRIDC6AG013590	C2H2-type zinc finger transcription factor
73698247	TraesCS6A01G105300	RT_RNaseH domain-containing protein	72553992	TRIDC6AG013600	Glyco_transf_20 domain-containing protein
73723564	TraesCS6A01G105400	50S ribosomal protein L3, chloroplastic	72554336	TRIDC6AG013610	Two-component system sensor kinase
			72566143	TRIDC6AG013620	BTB/POZ domain-containing protein
			72575209	TRIDC6AG013630	Peroxisomal targetingg signal 1
			72594973	TRIDC6AG013640	Uncharacterized protein
			72637156	TRIDC6AG013650	50s ribosomal protein L3
